# Supplementary material for: Cerium Oxide Nanoparticles Protect Cortical Astrocytes from Oxygen–Glucose Deprivation through Activation of the Ca2+ Signaling System
Source: MDPI journal article supplement (doi:10.3390/ijms241814305), 2023-09-19
Supplement: s1 [file s1]

Fura-2

PI

Control

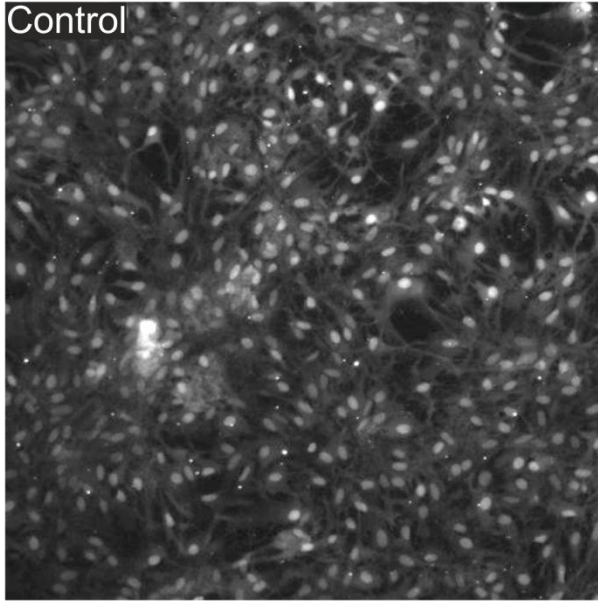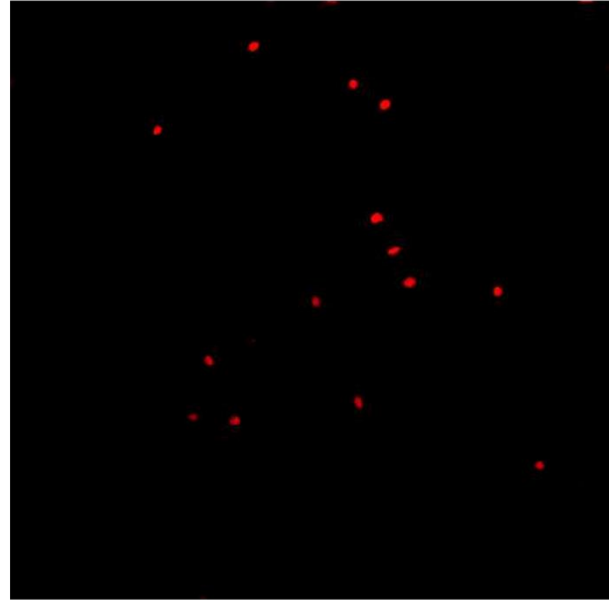

CeNPs  
10  $\mu\text{g/mL}$

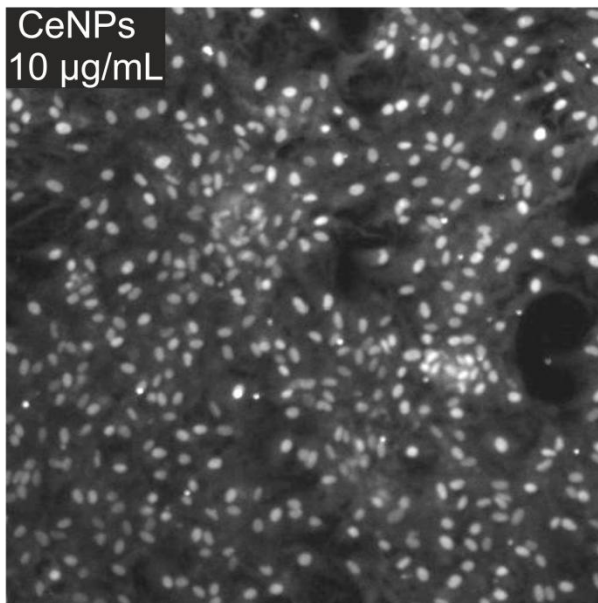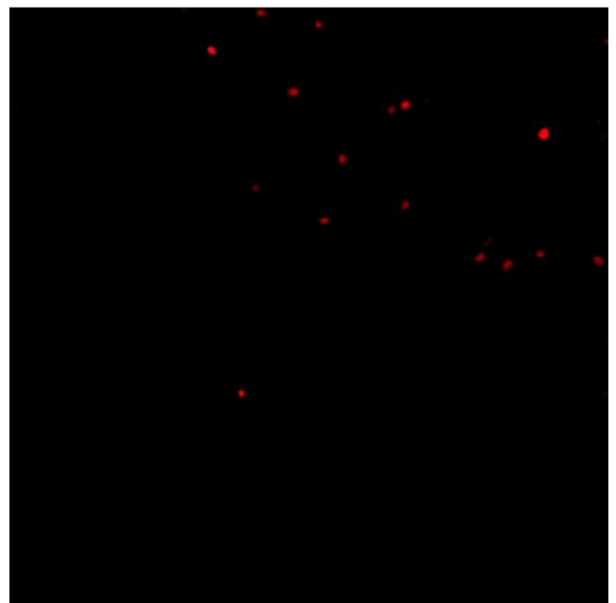

CeNPs  
100  $\mu\text{g/mL}$

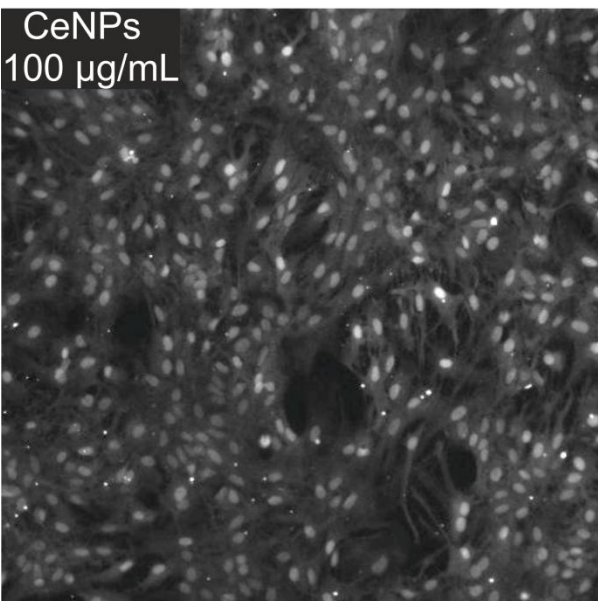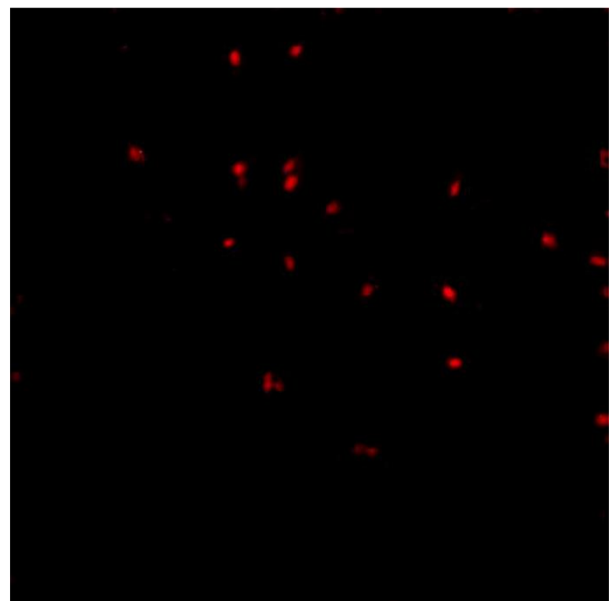

**Figure S1.** Application of 10 or 100  $\mu\text{g/mL}$  CeNPs to cortical astrocytes in an acute experiment (time of  $[\text{Ca}^{2+}]_i$  dynamics registration =  $15 \pm 7$  min) does not cause cell death. Images of cortical cell cultures stained with the  $\text{Ca}^{2+}$ -sensitive probe Fura-2 and Propidium iodide (PI) (reflecting necrosis-type cell death) are presented. Control – astrocytes were not exposed to CeNPs. CeNPs 10  $\mu\text{g/mL}$  and 100  $\mu\text{g/mL}$  – application of CeNPs in an acute experiment and subsequent staining with PI. The presence of a red pseudo-color (PI fluorescence) indicates dead cells.

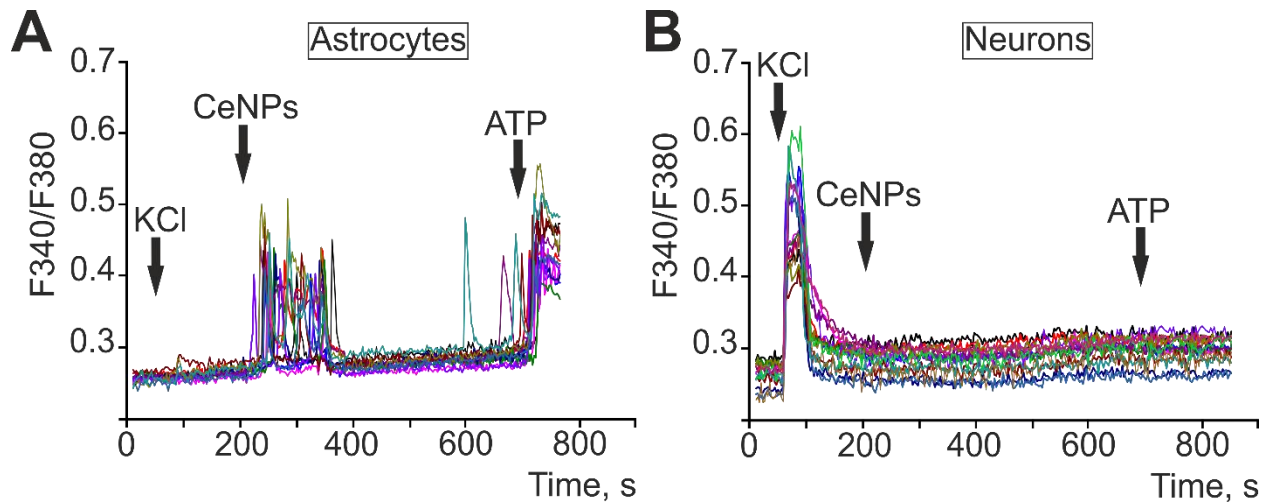

**Figure S2.** Upon application of 30  $\mu\text{g/mL}$  CeNPs to a neuroglial culture of the cerebral cortex, astrocytes (A) but not neurons (B) respond with an increase in  $[\text{Ca}^{2+}]_i$ . To identify neurons at the beginning of the experiment, a short-term (30 s) application of 30 mM KCl was performed. At the end of the experiment, 10  $\mu\text{M}$  ATP was added to the cells to detect astrocytes. The  $\text{Ca}^{2+}$  signals of neurons and astrocytes are shown in one experiment.

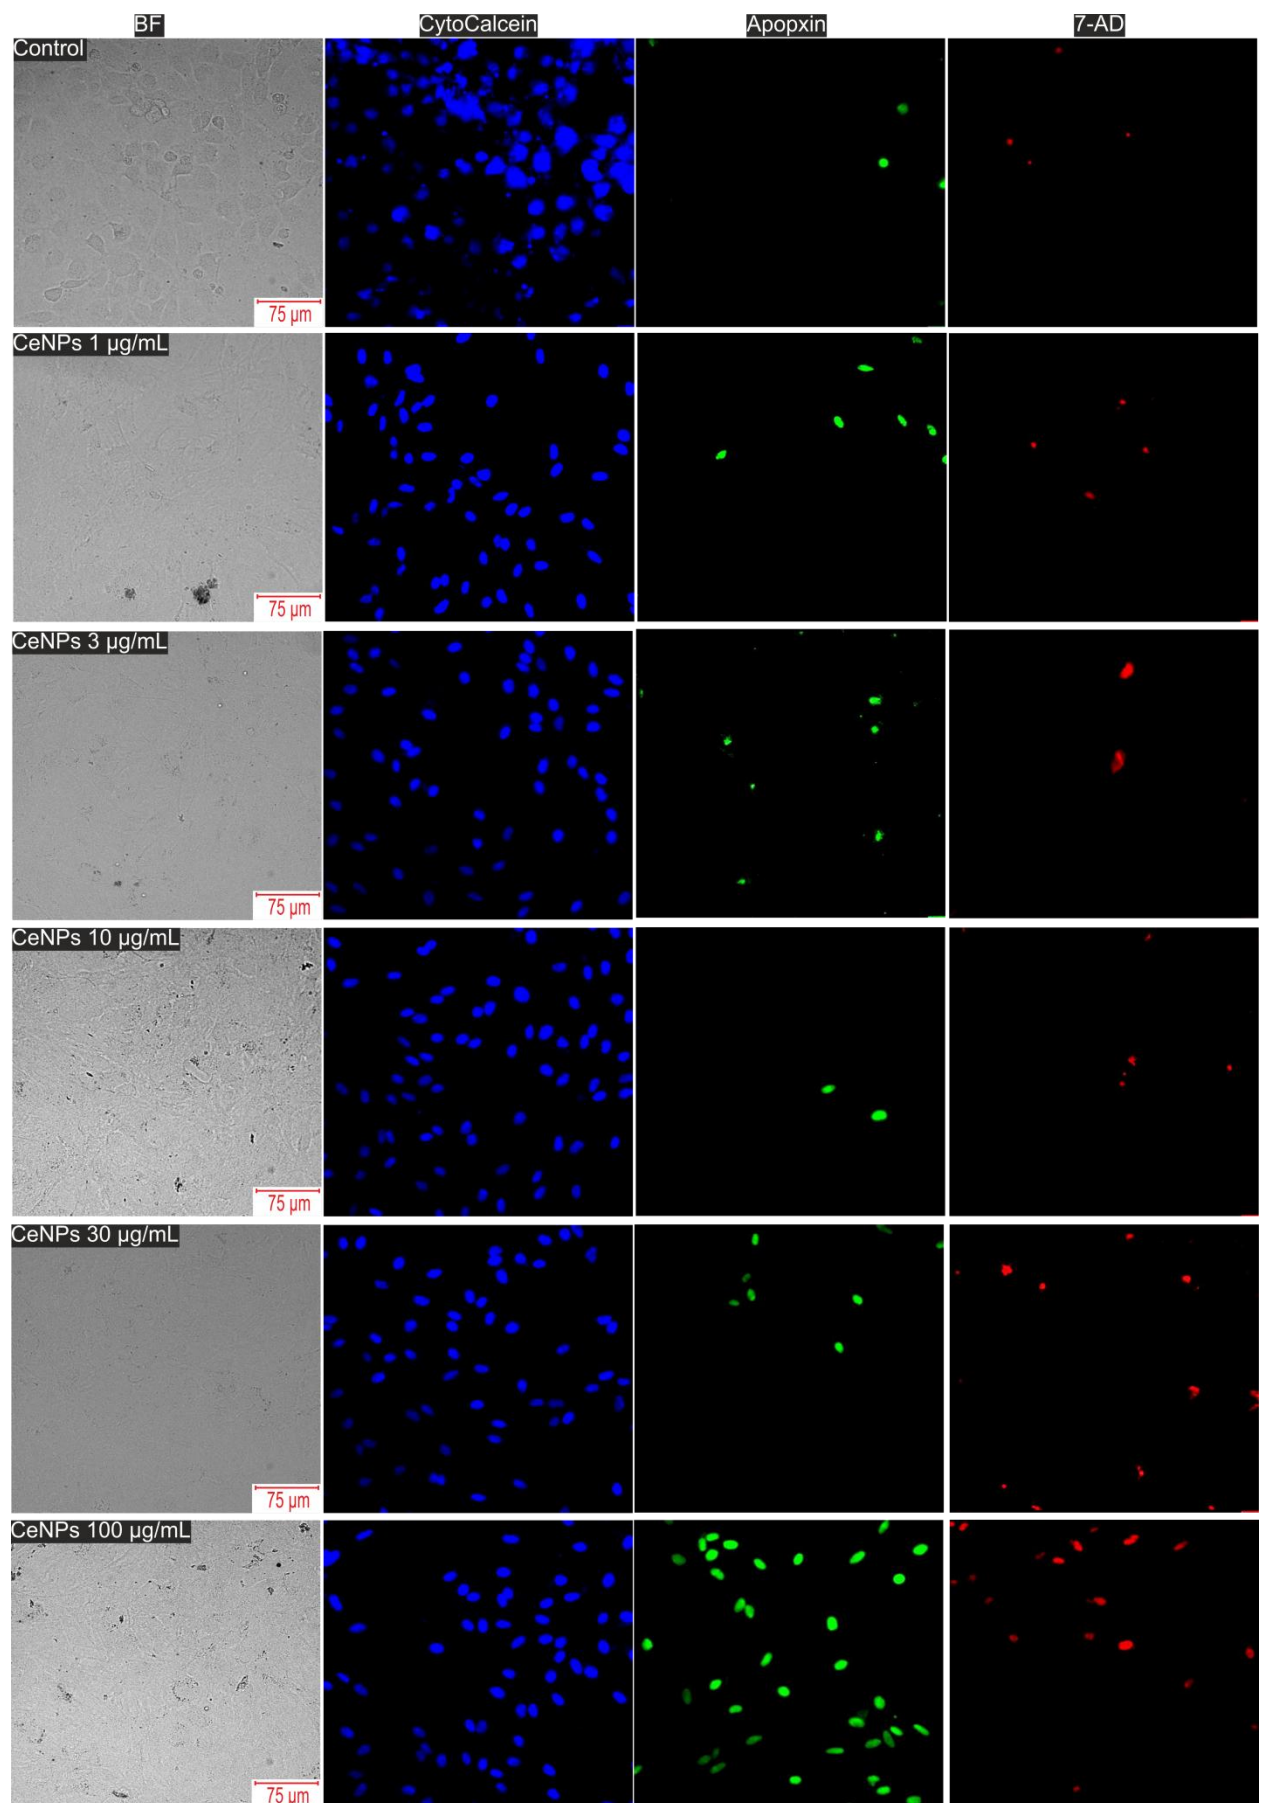

**Figure S3.** Effect of 24-hour incubation of cortical astrocytes with 1, 3, 10, 30 and 100 µg/mL of CeNPs on the induction of necrosis and apoptosis. Cells

staining using the Apoptosis/Necrosis Detection Kit assay. BF – bright-field microscopy, CytoCalcein – healthy cells indicator, Apopxin – apoptotic cells indicator and 7-AD (7-aminoactinomycin D) – necrotic cells indicator.
